# Supplementary material for: Allocating scarce resources in real-time to reduce heart failure readmissions: a prospective, controlled study
Source: PubMed Central journal article supplement — BMJ Qual Saf. 2013 Aug 1;22(12):998–1005. doi: 10.1136/bmjqs-2013-001901 (PMC3888600; doi:10.1136/bmjqs-2013-001901), 2013-08-01
Supplement: bmjqs-2013-001901-s1.pdf [file bmjqs-2013-001901-s1.pdf]

## **Appendix A: List of ICD-9 Codes**

Heart Failure: 402.01, 402.11, 402.91, 404.01, 404.03, 404.11, 404.13, 404.91, 404.93, 428.0, 428.1, 428.20, 428.21, 428.22, 428.23, 428.30, 428.31, 428.32, 428.33, 428.40, 428.41, 428.42, 428.43, 428.9.

Acute Myocardial Infarction: 410.00, 410.01, 410.10, 410.11, 410.20, 410.21, 410.30, 410.31, 410.40, 410.41, 410.50, 410.51, 410.60, 410.61, 410.70, 410.71, 410.80, 410.81, 410.90, 410.91.

Pneumonia: 480.0, 480.1, 480.2, 480.3, 480.8, 480.9, 481, 482.0, 482.1, 482.2, 482.30, 482.31, 482.32, 482.39, 482.40, 482.41, 482.49, 482.81, 482.82, 482.83, 482.84, 482.89, 482.9, 483.0, 483.1, 483.8, 485, 486, 487.0).

Diabetes Mellitus: 250.xx

Coronary Artery Disease: 414.0x

Chronic Kidney Disease: 585

Cancer: 140.0- 172.9, 174.0 - 175.9, 179-195.8; 196.0 – 199.1; 11.90, 31.0, 39.1, 78.5, 112.4, 114.0, 115.95, 117.5, 136.3.
